# Supplementary material for: Phenotyping chronic tinnitus patients using self-report questionnaire data: cluster analysis and visual comparison
Source: PubMed Central journal article supplement (PMC7532444; doi:10.1038/s41598-020-73402-8), 2020-10-02

–Supplementary Material–

# Phenotyping chronic tinnitus patients using self-report questionnaire data: cluster analysis and visual comparison

Uli Niemann<sup>1,\*</sup>, Petra Brueggemann<sup>2</sup>, Benjamin Boecking<sup>2</sup>, Wilhelm Mebus<sup>2</sup>,  
Matthias Rose<sup>3</sup>, Myra Spiliopoulou<sup>1</sup>, and Birgit Mazurek<sup>2</sup>

<sup>1</sup>Faculty of Computer Science, Otto von Guericke University Magdeburg, Magdeburg, Germany

<sup>2</sup>Tinnitus Center, Charité Universitaetsmedizin Berlin, Berlin, Germany

<sup>3</sup>Division of Psychosomatic Medicine, Medical Department, Charité Universitaetsmedizin Berlin, Berlin, Germany

\*Corresponding author: [uli.niemann@ovgu.de](mailto:uli.niemann@ovgu.de)

## Supplementary Figure S1

**Graphical summary of feature value distribution for each phenotype.** For numerical features, semi-transparent boxplots are shown on top of dashed violin plots. A diamond symbol depicts the mean value. Barcharts are shown for proportion features. Features are presented in the same order as in Figure 1 (clockwise).

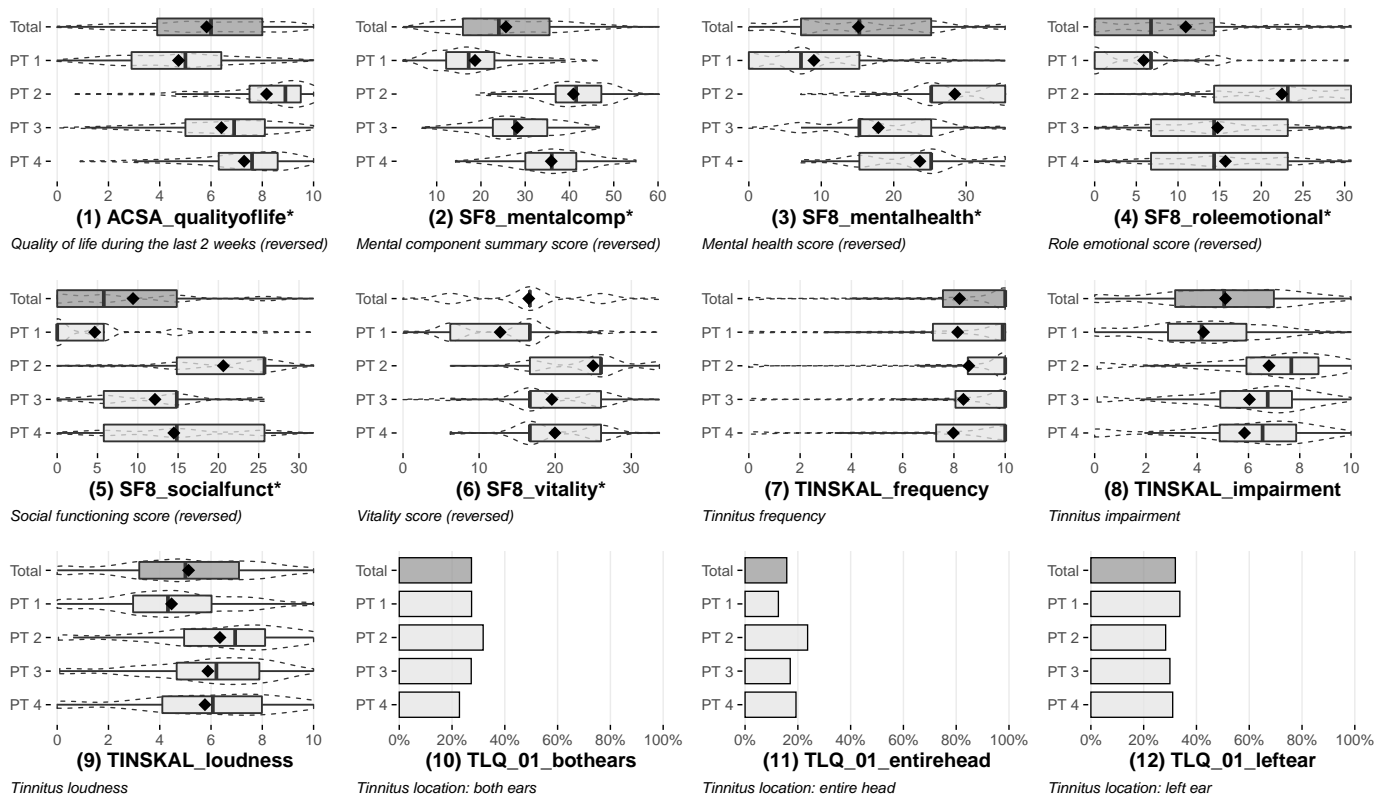

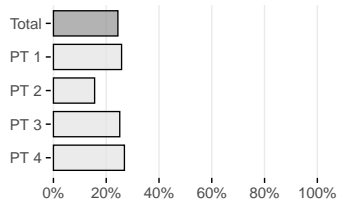

**(13) TLQ\_01\_rightear**

*Tinnitus location: right ear*

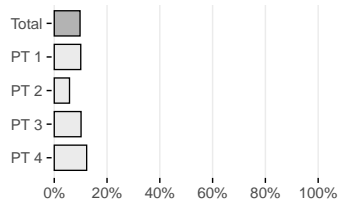

**(14) TLQ\_02\_hissing**

*Tinnitus noise: hissing*

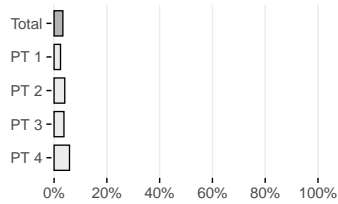

**(15) TLQ\_02\_ringing**

*Tinnitus noise: ringing*

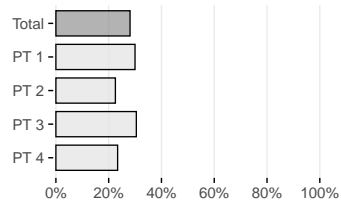

**(16) TLQ\_02\_rustling**

*Tinnitus noise: rustling*

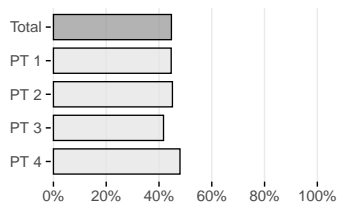

**(17) SF8\_02\_whistling**

*Tinnitus noise: whistling*

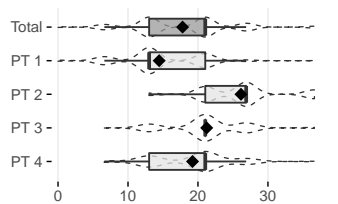

**(18) SF8\_overallhealth\***

*Overall health score (reversed)*

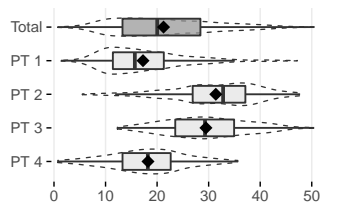

**(19) SF8\_physicalcomp\***

*Physical component summary score (reversed)*

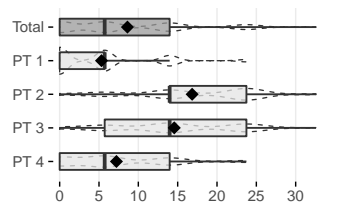

**(20) SF8\_physicalfunct\***

*Physical functioning score (reversed)*

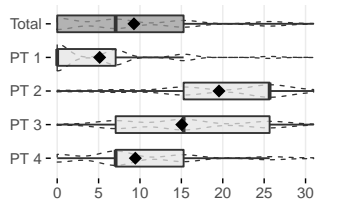

**(21) SF8\_rolephysical\***

*Role physical score (reversed)*

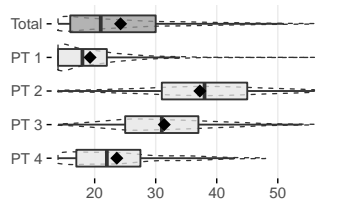

**(22) SES\_affectivepain**

*Affective pain*

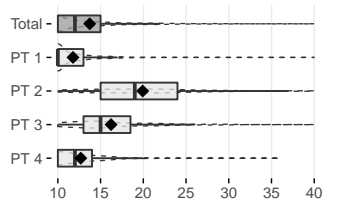

**(23) SES\_sensoricpain**

*Sensoric pain*

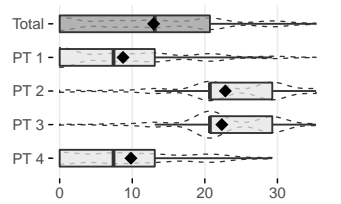

**(24) SF8\_bodilyhealth\***

*Bodily health score (reversed)*

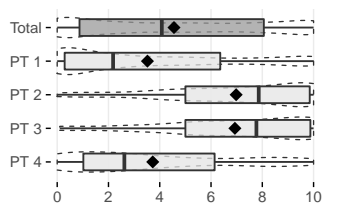

**(25) SSKAL\_painfrequency**

*Visual analog scale pain frequency*

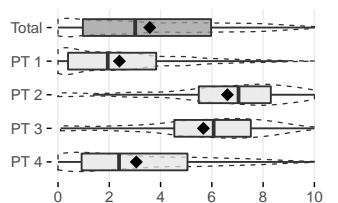

**(26) SSKAL\_painimpairment**

*Visual analog scale pain impairment*

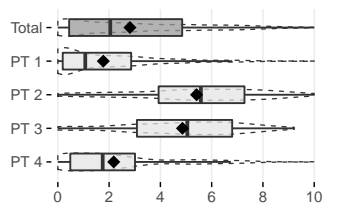

**(27) SSKAL\_painseverity**

*Visual analog scale pain severity*

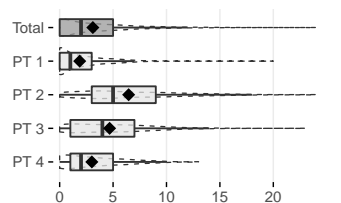

**(28) BI\_abdominalsymptoms**

*Abdominal symptoms score*

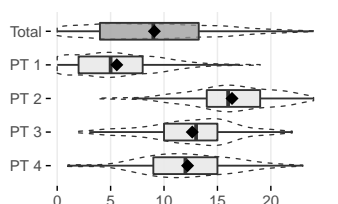

**(29) BI\_fatigue**

*Fatigue score*

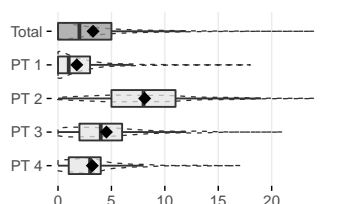

**(30) BI\_heartsymptoms**

*Heart symptoms score*

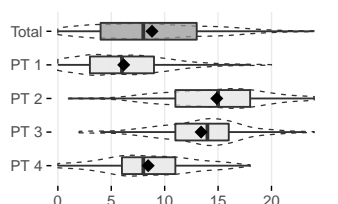

**(31) BI\_limbpain**

*Limb pain score*

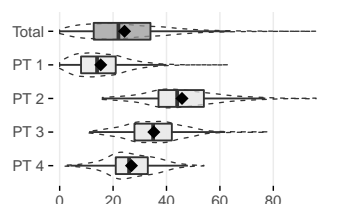

**(32) BI\_overallcomplaints**

*Overall complaints sum score*

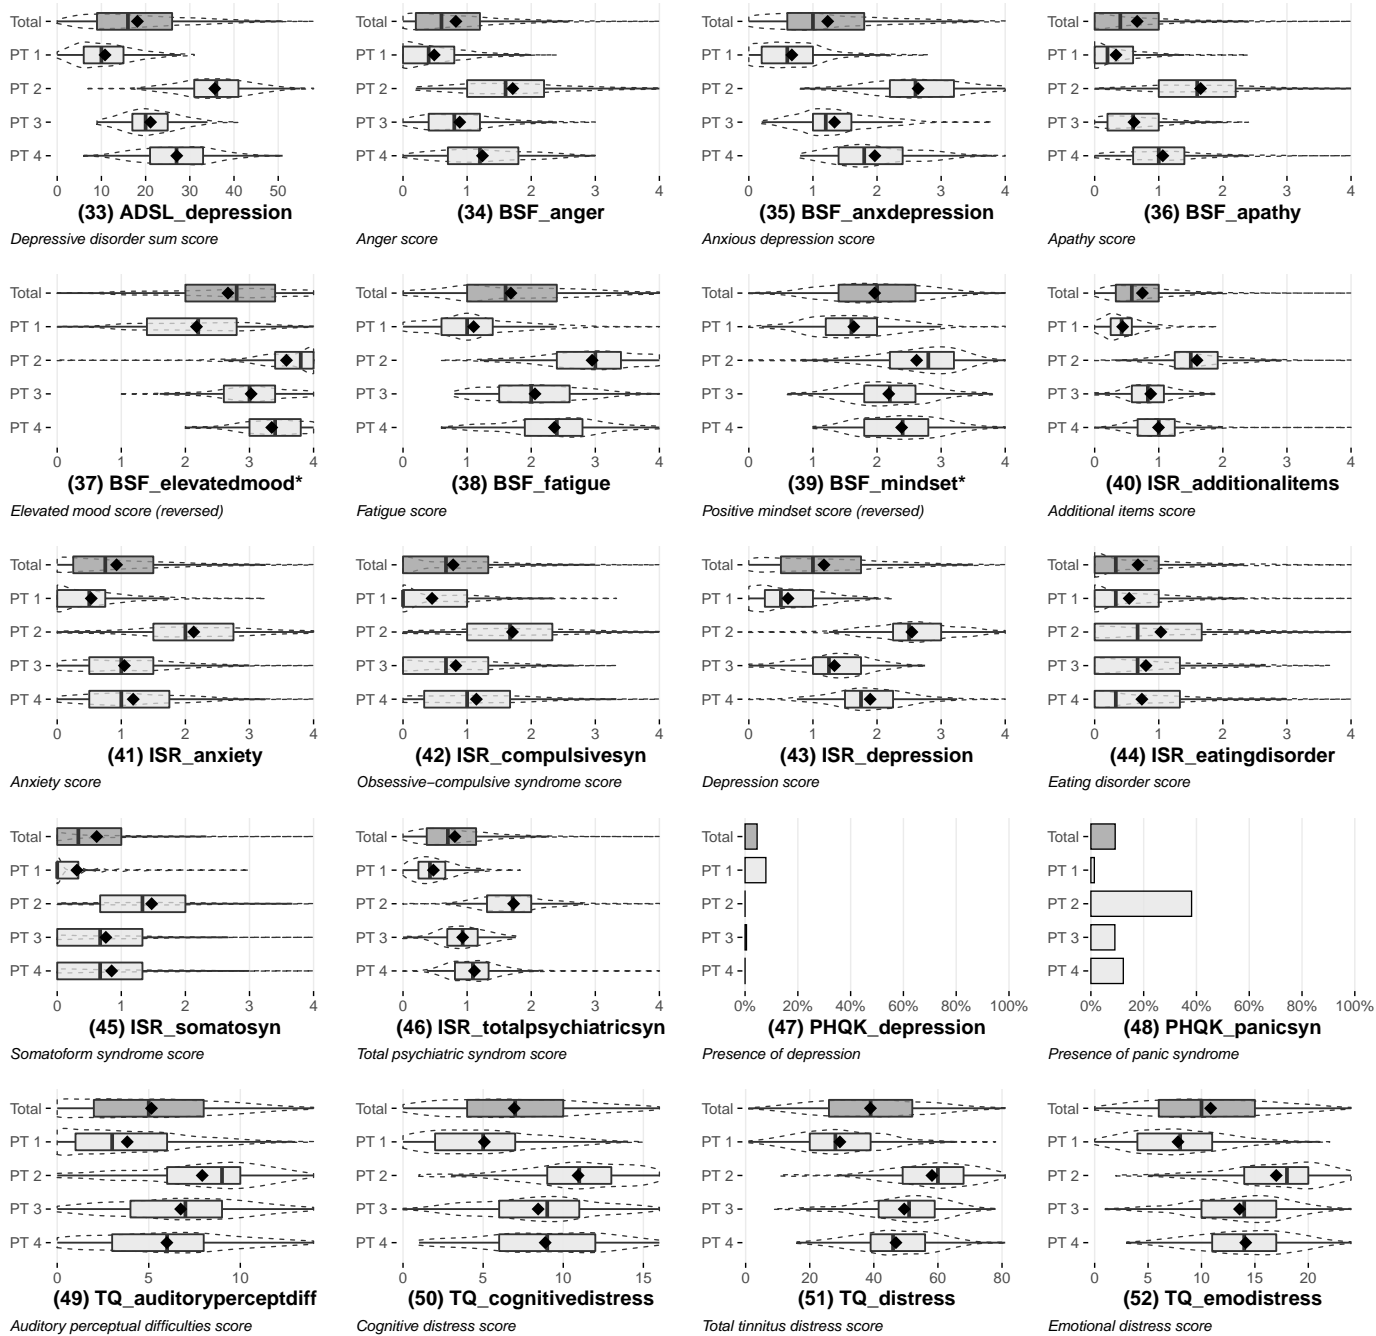

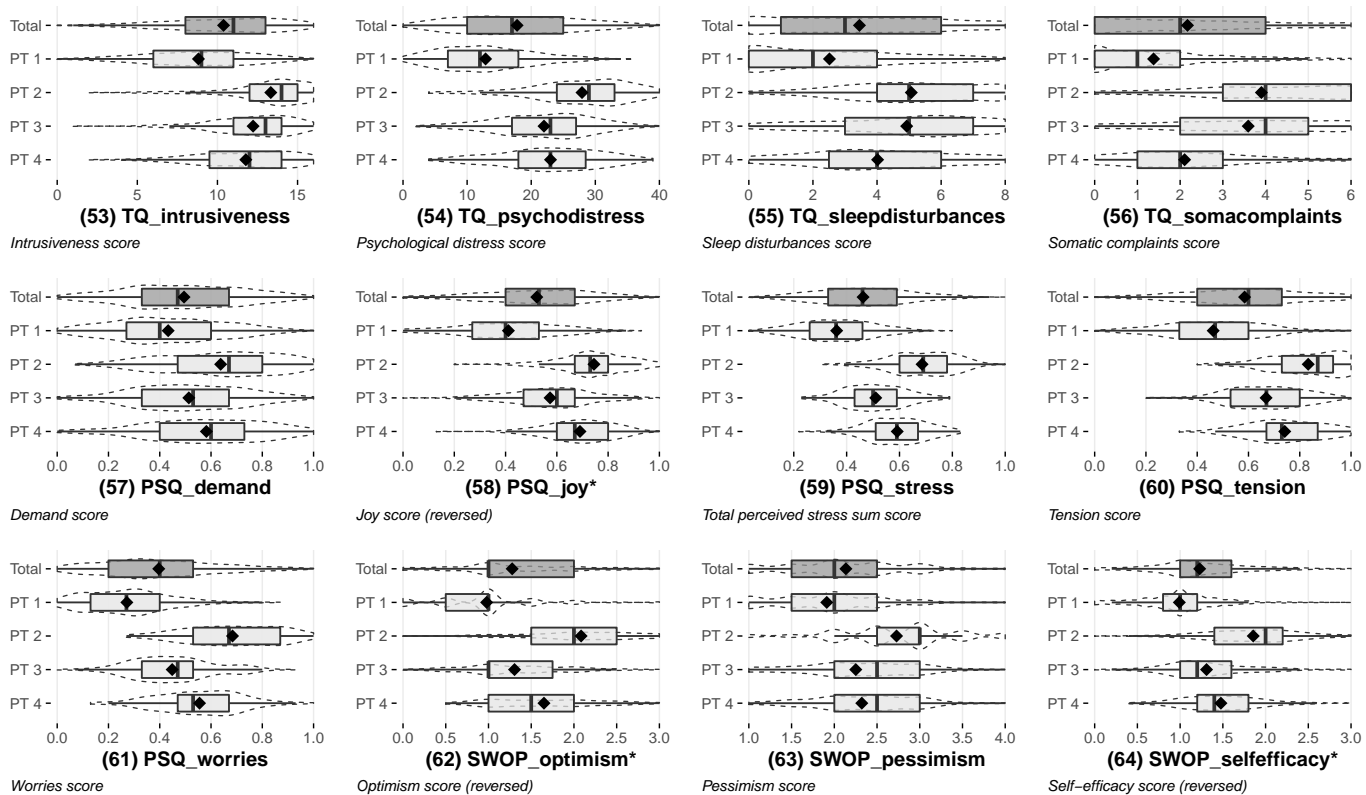

Supplement: 41598_2020_73402_MOESM1_ESM.pdf [file 41598_2020_73402_MOESM1_ESM.pdf]
